# Supplementary material for: What Lies Behind Successful Regulation? A Qualitative Evaluation of Pilot Implementation of Kenya’s Health Facility Inspection Reforms
Source: PubMed Central journal article supplement (PMC9808232; doi:10.34172/ijhpm.2021.90), 2021-08-25

**Article title:** What Lies Behind Successful Regulation? A Qualitative Evaluation of Pilot Implementation of Kenya’s Health Facility Inspection Reforms

**Journal name:** International Journal of Health Policy and Management (IJHPM)

**Authors’ information:** Eric Tama<sup>1\*</sup>, Irene Khayoni<sup>1</sup>, Catherine Goodman<sup>2</sup>, Dosila Ogira<sup>1</sup>, Timothy Chege<sup>1</sup>, Njeri Gitau<sup>3</sup>, Francis Wafula<sup>1</sup>

<sup>1</sup>Institute of Healthcare Management, Strathmore University Business School, Strathmore University, Nairobi, Kenya.

<sup>2</sup>Department of Global Health and Development, London School of Hygiene and Tropical Medicine, University of London, London, UK.

<sup>3</sup>World Bank Group, Nairobi, Kenya.

(\*Corresponding authors: [etama@strathmore.edu](mailto:etama@strathmore.edu))

**Supplementary file 5.** Coding Tree

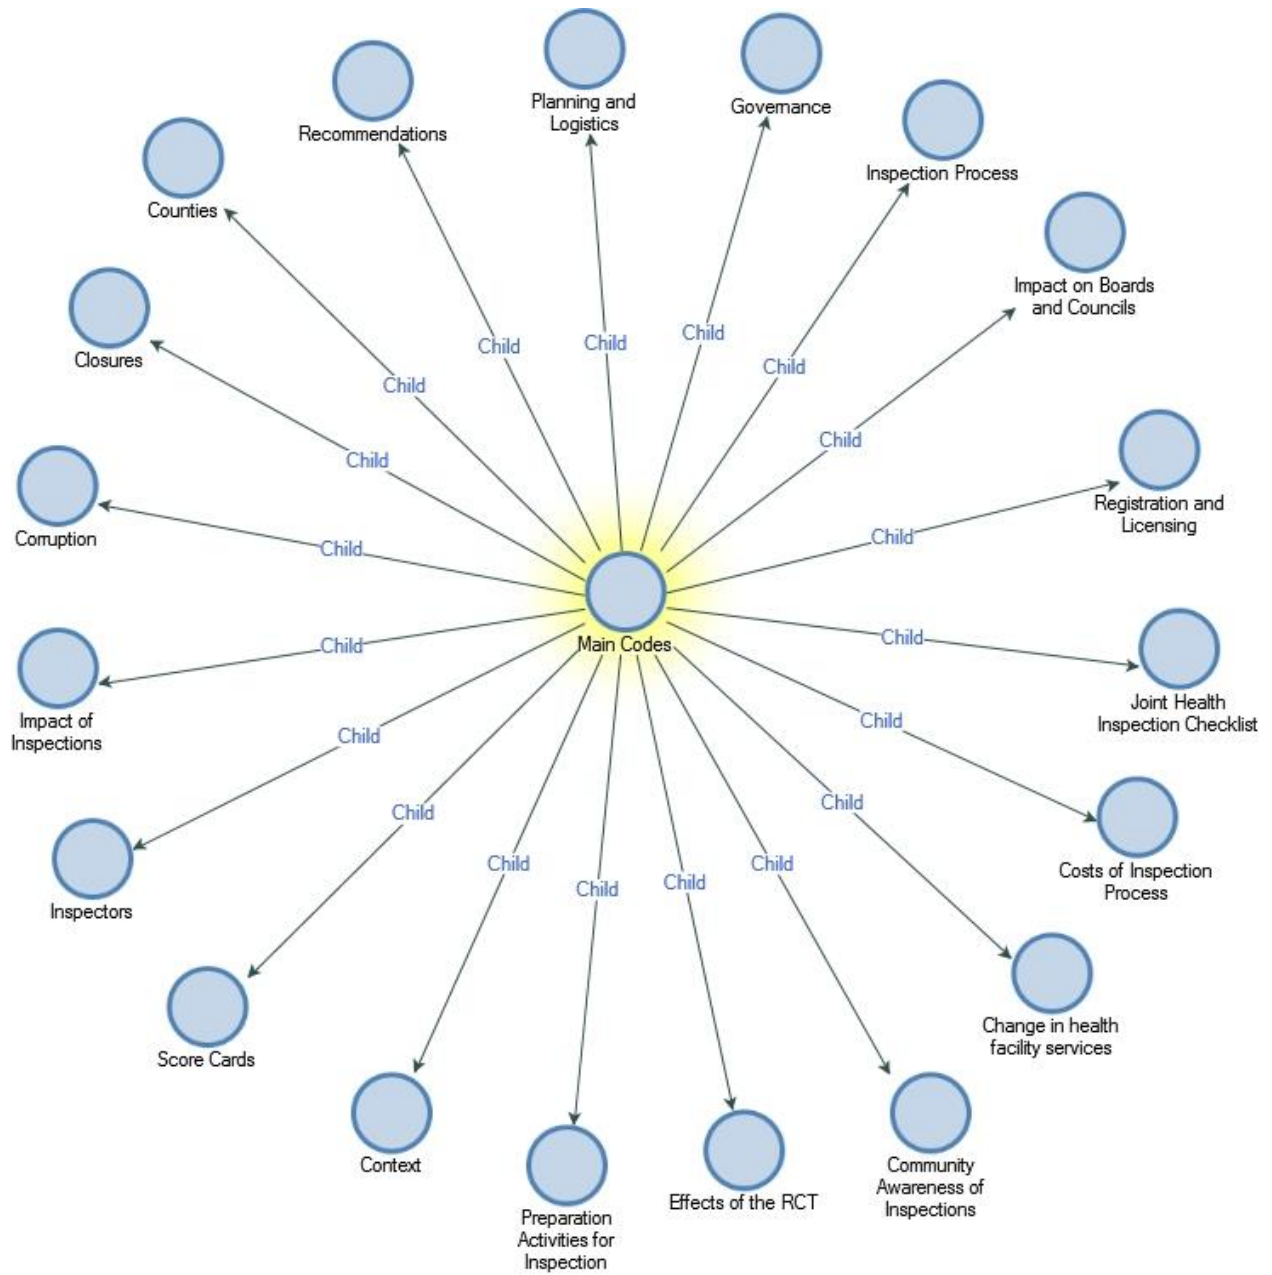

Supplement: ijhpm-11-1852-s005.pdf [file ijhpm-11-1852-s005.pdf]
